# Supplementary material for: Formamidinium-based Ruddlesden–Popper perovskite films fabricated via two-step sequential deposition: quantum well formation, physical properties and film-based solar cells
Source: Royal Society of Chemistry journal article supplement (doi:10.1039/d1ee02851k), 2022-01-01
Supplement: d1ee02851k1.pdf [file d1ee02851k1.pdf]

## Supporting Information

### **Formamidinium-based Ruddlesden-Popper perovskite films fabricated via two-step sequential deposition: quantum well formation, physical properties and film-based solar cells**

Jing Lu,<sup>‡a</sup> Tinghuan Yang,<sup>‡a</sup> Tianqi Niu,<sup>‡a</sup> Nuo Bu,<sup>a</sup> Yalan Zhang,<sup>a</sup> Shiqiang Wang,<sup>a</sup> Junjie Fang,<sup>a</sup> Xiaoming Chang,<sup>a</sup> Tao Luo,<sup>a</sup> Jialun Wen,<sup>a</sup> Yingguo Yang,<sup>b</sup> Zicheng Ding,<sup>\*a</sup> Kui Zhao,<sup>\*ac</sup> and Shengzhong (Frank) Liu<sup>\*ad</sup>

<sup>a</sup> *Key Laboratory of Applied Surface and Colloid Chemistry, Ministry of Education; Shaanxi Key Laboratory for Advanced Energy Devices; Shaanxi Engineering Lab for Advanced Energy Technology, School of Materials Science and Engineering, Shaanxi Normal University, Xi'an 710119, China. Email: [zcding@snnu.edu.cn](mailto:zcding@snnu.edu.cn); [zhaok@snnu.edu.cn](mailto:zhaok@snnu.edu.cn)*

<sup>b</sup> *Shanghai Synchrotron Radiation Facility (SSRF), Zhangjiang Lab, Shanghai Advanced Research Institute, Chinese Academy of Sciences, Shanghai 201204, China*

<sup>c</sup> *School of Materials Science and Engineering Jiangsu Collaborative Innovation Center of Photovoltaic Science and Engineering Jiangsu, Province Cultivation Base for State Key Laboratory of Photovoltaic Science and Technology, Changzhou University, Changzhou 213164, China*

<sup>d</sup> *Dalian National Laboratory for Clean Energy; iChEM, Dalian Institute of Chemical Physics, Chinese Academy of Sciences, Dalian, 116023, China. Email: [szliu@dicp.ac.cn](mailto:szliu@dicp.ac.cn)*

<sup>‡</sup> *J.L., T.Y. and T.N. contributed equally.*

*Corresponding Authors: [zcding@snnu.edu.cn](mailto:zcding@snnu.edu.cn); [zhaok@snnu.edu.cn](mailto:zhaok@snnu.edu.cn); [szliu@dicp.ac.cn](mailto:szliu@dicp.ac.cn)*

## Experimental Section

**Materials preparation:** N, N-dimethylformamide (DMF, 99.8%), dimethyl sulfoxide (DMSO, 99.9%) and isopropanol (IPA, 99.8%) were purchased from Sigma-Aldrich. 4-tert-butylpyridine (96%), acetonitrile (99.7+%), chlorobenzene (CB, 99.8%) and lithium bis(trifluoromethanesulfonyl)imide (99%) were purchased from Aladdin Reagent. Lead iodide ( $\text{PbI}_2$ , 99.9985%), and formamidinium iodide (FAI, 99.5%) were obtained from Advanced Election Technology CO., Ltd.. PMAI (benzylamine hydroiodide, 99.5%) was obtained from p-OLED. 2,2',7,7'-tetrakis-(N,N-di-p-methoxyphenylamine)-9,9'-spirobifluorene (Spiro-OMeTAD,  $\geq 99.0\%$ ) was purchased from Shenzhen Feiming Science and Technology Co., Ltd.. The purity of gold wire is 99.99%. All chemicals were used as received without further purification.

**Solution preparation:** 1.5 mmol  $\text{PbI}_2$  dissolved in 1 mL of mixture solvent with DMSO and DMF (volume ratio of 1:9), then the  $\text{PbI}_2$  solution was stirred at  $60^\circ\text{C}$  for 6 hours. The molar ratio of PMAI:FAI in IPA increasing from 2:3 to 2:9 and 2:59 were prepared and stirred overnight at room temperature, according to the formula Ruddlesden-Popper (RP) type  $\text{PMA}_2\text{FA}_{n-1}\text{Pb}_n\text{I}_{3n+1}$  ( $n=4, 10, 60$ ). The Spiro-OMeTAD solution was prepared by dissolving 90 mg Spiro-OMeTAD and 22  $\mu\text{L}$  lithium bis(trifluoromethanesulfonyl)imide in acetonitrile and 36  $\mu\text{L}$  4-tert-butylpyridine in 1 mL CB. All solutions filtered with a 0.45  $\mu\text{m}$  pore size polytetrafluoroethylene filter membrane. In addition, all progresses were conducted under an  $\text{N}_2$  atmosphere inside a glove box.

**Device fabrication:** The FTO-coated glass (2.5 cm  $\times$  2.5 cm) was cleaned by sequential sonication in acetone, isopropanol and ethanol for 30 min each and then dried under  $\text{N}_2$  flow and treated by  $\text{O}_3$  plasma for 15 min. The  $\text{TiO}_2$  was prepared by chemical bath deposition with the clean substrate immersed in a  $\text{TiCl}_4$  (CP, Sinopharm Chemical Reagent Co., Ltd.) aqueous solution with the volume ratio of  $\text{TiCl}_4:\text{H}_2\text{O}$  equal to 0.0225:1 at  $70^\circ\text{C}$  for 1 hour. The spin-coating was accomplished under inert atmosphere inside a nitrogen glove box. The  $\text{PbI}_2$  film was deposited using a 1.5 M precursor solution spin-coated at 1500 rpm for 30 s and then placed on a hotplate for 1 min at  $70^\circ\text{C}$ . The 300  $\mu\text{L}$  IPA containing three kinds of ratio for PMAI:FAI was cast on the  $\text{PbI}_2$  film during spin-coating at 2000 rpm for 30 s, followed by thermal annealing at  $150^\circ\text{C}$  for 15 min under 30–40% relative humidity. Subsequently, the Spiro-OMeTAD layer

was deposited on top of the perovskite by spin-coating at 5000 rpm for 30 s followed by evaporation of 100 nm gold electrodes on top of the stack.

**Device Characterization:** UV–visible absorption spectra were acquired on a PerkinElmer UV-Lambda 950 instrument. Steady-state photoluminescence (PL) (excitation at 510 nm, front-side excitation) and time-resolved photoluminescence (TRPL) were measured with a PicoQuant FT-300. Femtosecond pump-probe transient absorption (TA) measurements were performed at appropriate power density ( $29.88 \mu\text{J cm}^{-2}$ ). The pump pulse with a wavelength of 450 nm and duration of 290 fs generated via a second harmonic generator (SHG) was used to excite all the samples and the probe beam (from 450 to 950 nm) was detected by a high-speed spectrometer. All experiments were carried out at room temperature (i.e.  $T = 300\text{K}$ ). The surface morphology and structure of the perovskite films were characterized by scanning electronic microscopy (SEM) (FE-SEM; SU-8020, Hitachi) at an acceleration voltage of 3 kV. X-ray diffraction (XRD) measurements were carried out in a  $\theta$ - $2\theta$  configuration with a scanning interval of  $2\theta$  between  $3^\circ$  and  $60^\circ$  on a Rigaku Smart Lab (X-ray Source: Cu  $K\alpha$ ;  $\lambda = 1.54 \text{ \AA}$ ). Grazing incidence wide angle X-ray scattering (GIWAXS) images were collected using a Xeuss 2.0 spectrometer (Xenocs company) with MetalJet-D2 (Excillum) as the X-ray source and Pilatus 3R 1M (Dectris) as the detector placed 216.723 mm away from the sample position. The incidence angle of the X-ray beam was  $0.15^\circ$ . Electron-only devices (FTO/c-TiO<sub>2</sub>/Perovskite/PCBM/Ag) were fabricated to calculate the electron mobility of the devices. The dark  $J$ - $V$  characteristics of the electron-only devices were measured on a Keithley 2400 SourceMeter. The mobility is extracted by fitting the  $J$ - $V$  curves to the Mott-Gurney equation. The trap-state density was determined by the trap-filled limit voltage using the equation in the text. The  $J$ - $V$  curves of the perovskite solar cells were analyzed using a Keithley 2400 SourceMeter under ambient conditions at room temperature, and the illumination intensity was  $100 \text{ mw cm}^{-2}$  (AM 1.5G Oriel solar simulator). The scan rate was  $0.3 \text{ V s}^{-1}$ , the delay time was 10 ms, and the scan step was 0.02 V. The power output of the lamp was calibrated against an NREL-traceable KG5 filtered silicon reference cell. The device area of  $0.09 \text{ cm}^2$  is defined by a metal aperture to avoid light scattering from the metal electrode into the device during the measurement. The EQE was characterized on the QTest Station 2000ADI system (Crowntech. Inc., USA), and the light source is a 300 W xenon lamp. The monochromatic light intensity for EQE measurement was calibrated using a reference silicon

photodiode. All measurement were carried out without any encapsulation in ambient condition unless otherwise stated.

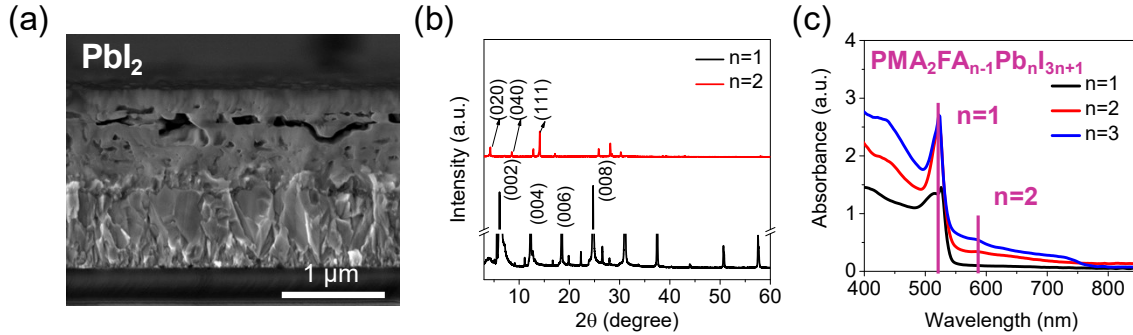

**Fig. S1** (a) Cross-sectional SEM images of the  $\text{PbI}_2$ . (b) XRD pattern of  $\text{PMA}_2\text{FA}_{n-1}\text{Pb}_{n-1}\text{I}_{3n+1}$  ( $n = 1, 2$ ) two-dimensional perovskite film prepared by one-step method. (c) The optical absorption spectrum of  $\text{PMA}_2\text{FA}_{n-1}\text{Pb}_{n-1}\text{I}_{3n+1}$  ( $n = 1, 2, 3$ ) two-dimensional perovskite film prepared by one-step method.

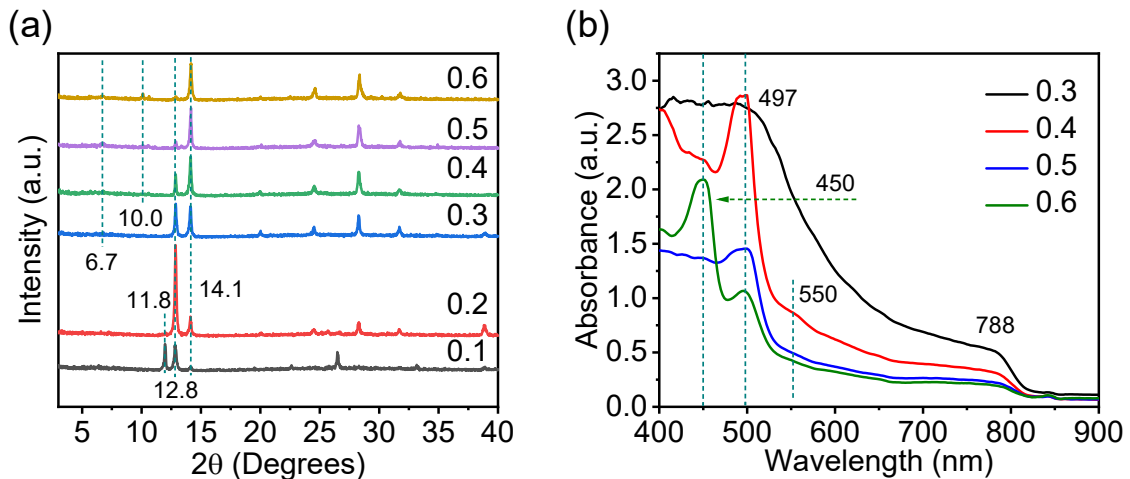

**Fig. S2** (a) and (b) XRD patterns and UV-Vis spectra of  $\text{FA}_2\text{FA}_{n-1}\text{Pb}_{n-1}\text{I}_{3n+1}$  films prepared via two-step sequential deposition of  $\text{PbI}_2$  (ca. 400 nm) and various concentrations of FAI.

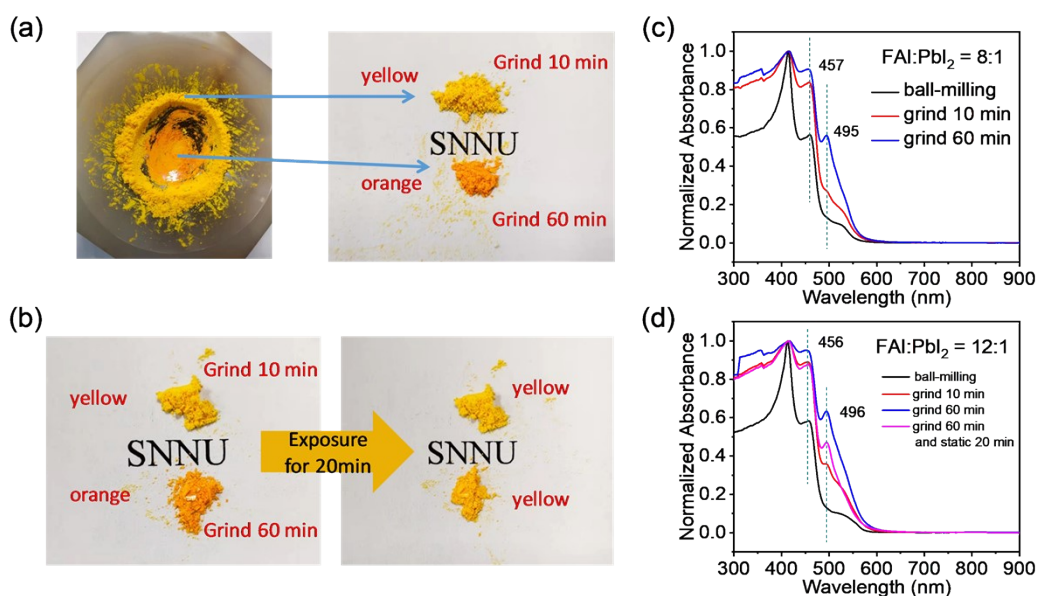

**Fig. S3** (a, b) The photos and corresponding. (c, d) UV-Vis spectra of  $\text{FA}_2\text{FA}_{n-1}\text{Pb}_n\text{I}_{3n+1}$  powders fabricated using ball-milling from  $\text{FAI}:\text{PbI}_2$  powders with molar ratio of 8:1 and

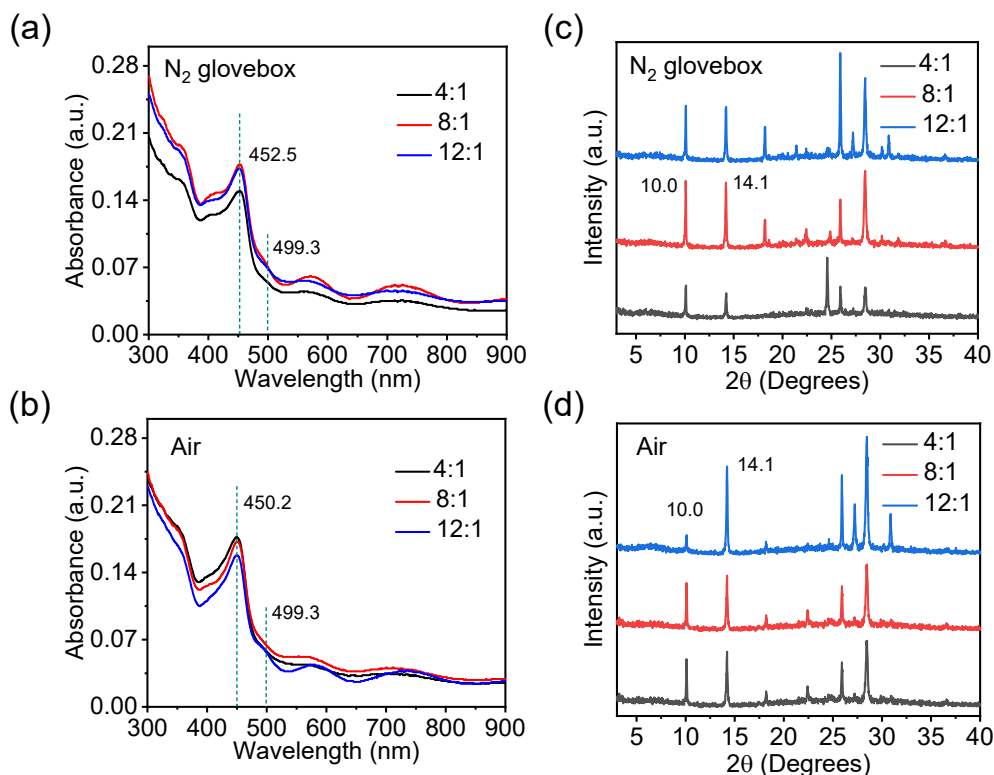

**Fig. S4** (a) and (b) UV-Vis spectra of  $\text{FA}_2\text{FA}_{n-1}\text{Pb}_n\text{I}_{3n+1}$  films prepared using one-step spin-coating from DMSO solvent in inert conditions and under ambient conditions, respectively. (c) and (d) XRD patterns of  $\text{FA}_2\text{FA}_{n-1}\text{Pb}_n\text{I}_{3n+1}$  films prepared using one-step spin-coating from DMSO solvent in inert conditions and under ambient conditions, respectively.

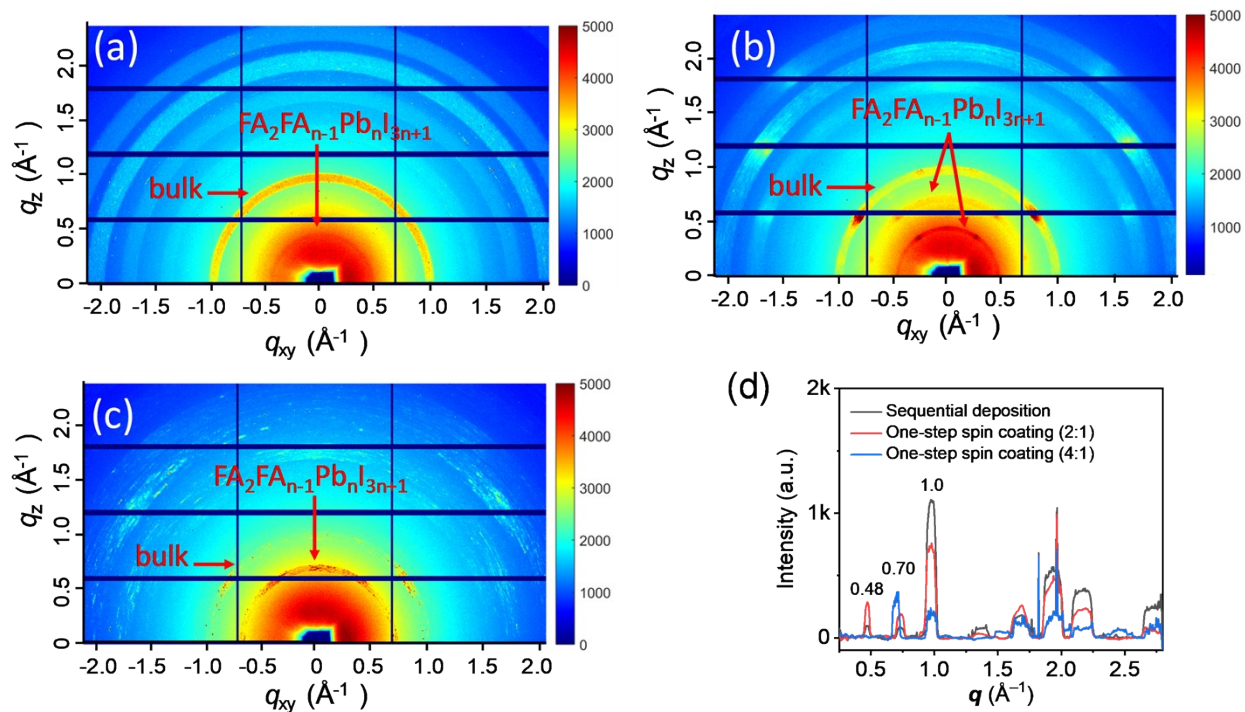

**Fig. S5** GIWAXS 2D images for (a)  $\text{FA}_2\text{FA}_{n-1}\text{Pb}_n\text{I}_{3n+1}$  films prepared via two-step sequential deposition of  $\text{PbI}_2$  (ca. 400 nm) and FAI  $0.6 \text{ mol L}^{-1}$ , (b)  $\text{FA}_2\text{FA}_{n-1}\text{Pb}_n\text{I}_{3n+1}$  films prepared from FAI: $\text{PbI}_2$  (2:1 molar ratio) from DMSO via one-step spin-coating, (c)  $\text{FA}_2\text{FA}_{n-1}\text{Pb}_n\text{I}_{3n+1}$  films prepared from FAI: $\text{PbI}_2$  (4:1 molar ratio) from DMSO via one-step spin-coating. (d) Corresponding line-profiles of 2D GIWAXS images for the three films.

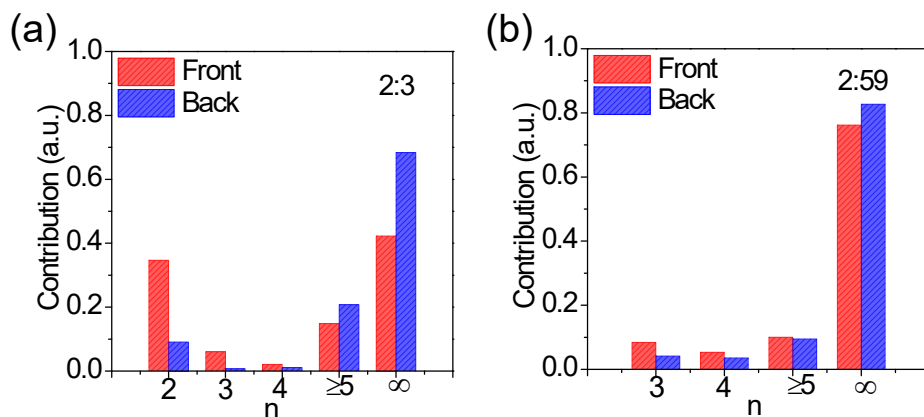

**Fig. S6** The composition of QWs in the (a) 2:3 and (b) 2:59 films estimated from the TA spectroscopy with 0.54 ps delay time.

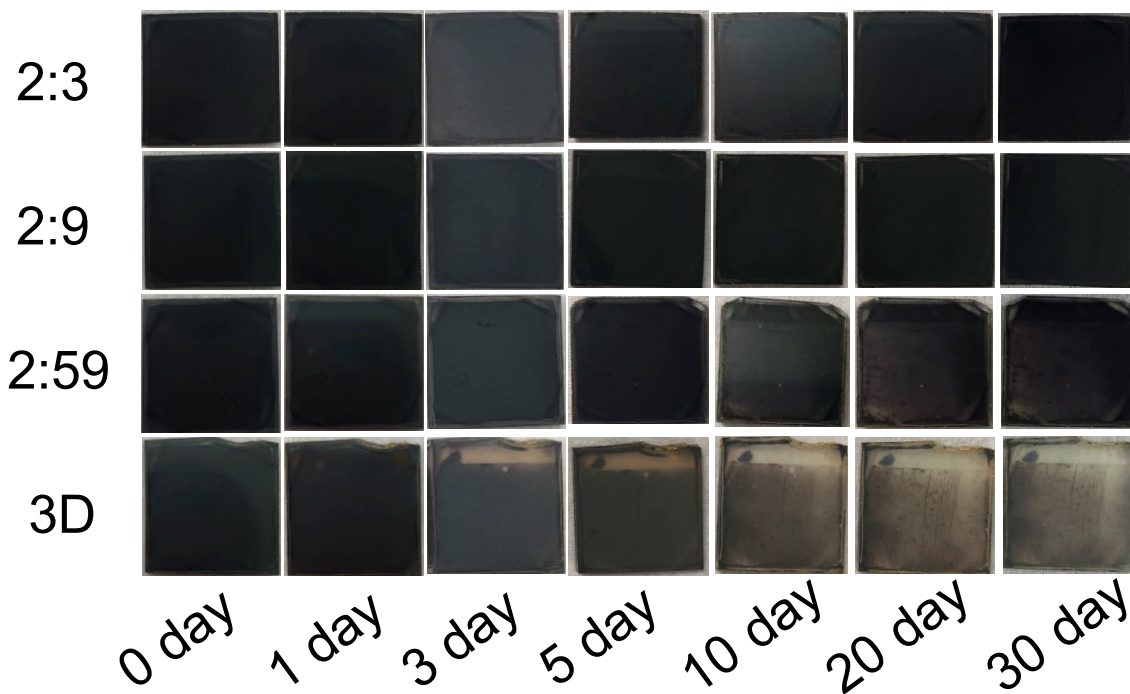

**Fig. S7** Photographs of 2:3, 2:9, 2:59 and 3D films after aging under ambient 40-50% relative humidity at room temperature for 30 days.

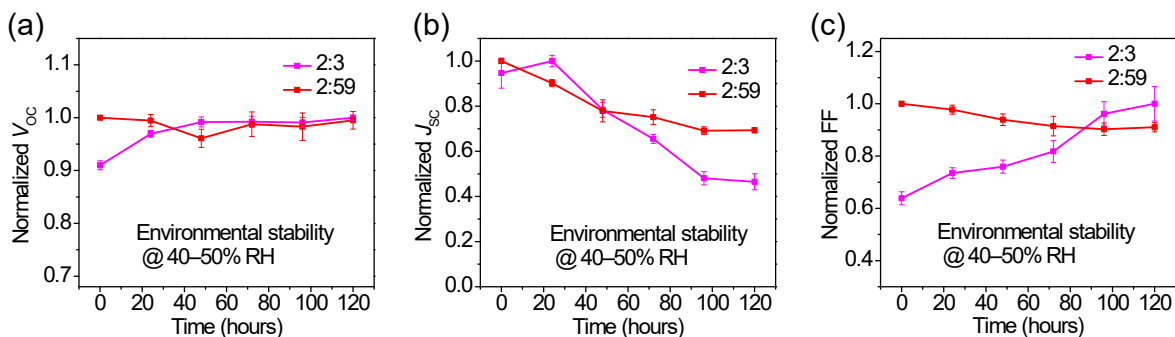

**Fig. S8** Environmental stability of devices parameters (a)  $V_{OC}$ , (b)  $J_{SC}$  and (c) FF, under ambient about 40-50% relative humidity at room temperature.

**Table S1** The phases detected as a function of the proportion of FA<sup>+</sup> in the synthesis and their main characteristic diffraction peaks and excitonic peaks. FA<sub>2</sub>FA<sub>n-1</sub>Pb<sub>n</sub>I<sub>3n+1</sub> films prepared via two-step sequential deposition of PbI<sub>2</sub> (ca. 400 nm) and various concentrations of FAI.

| FAI<br>(mol L <sup>-1</sup> ) | phases detected              |                  |                              | XRD Diffraction peaks                                               |                              |                  |                              | UV-Vis<br>(nm)                                                      |               |
|-------------------------------|------------------------------|------------------|------------------------------|---------------------------------------------------------------------|------------------------------|------------------|------------------------------|---------------------------------------------------------------------|---------------|
|                               | $\delta$ -FAPbI <sub>3</sub> | PbI <sub>2</sub> | $\alpha$ -FAPbI <sub>3</sub> | FA <sub>2</sub> FA <sub>n-1</sub> Pb <sub>n</sub> I <sub>3n+1</sub> | $\delta$ -FAPbI <sub>3</sub> | PbI <sub>2</sub> | $\alpha$ -FAPbI <sub>3</sub> | FA <sub>2</sub> FA <sub>n-1</sub> Pb <sub>n</sub> I <sub>3n+1</sub> |               |
| 0.1                           | ☺                            | ☺                | ☺                            |                                                                     | 11.8                         | 12.8             | 14.1                         |                                                                     |               |
| 0.2                           | ☺                            | ☺                | ☺                            |                                                                     | 11.8                         | 12.8             | 14.1                         |                                                                     |               |
| 0.3                           |                              | ☺                | ☺                            | n=2                                                                 |                              | 12.8             | 14.1                         | 6.7                                                                 | 788, 497      |
| 0.4                           |                              | ☺                | ☺                            | n=2, n=1                                                            |                              | 12.8             | 14.1                         | 6.7, 10.0                                                           | 788, 497, 450 |
| 0.5                           |                              | ☺                | ☺                            | n=2, n=1                                                            |                              | 12.8             | 14.1                         | 6.7, 10.0                                                           | 788, 497, 450 |
| 0.6                           |                              | ☺                | ☺                            | n=2, n=1                                                            |                              | 12.8             | 14.1                         | 6.7, 10.0                                                           | 788, 497, 450 |



**Table S2** Fitting parameters for time-resolved photoluminescence of perovskite films on glass substrate.

|      | $\tau_1$ (ns) | Intensity $\tau_1$ (%) | $\tau_2$ (ns) | Intensity $\tau_2$ (%) | average $\tau$ (ns) |
|------|---------------|------------------------|---------------|------------------------|---------------------|
| 2:3  | 3.8           | 18.6                   | 36.4          | 81.4                   | 30.3                |
| 2:9  | 5.5           | 2.0                    | 84.0          | 98.0                   | 82.4                |
| 2:59 | 12.6          | 0.9                    | 296.9         | 99.1                   | 294.4               |

**Table S3** PV performance parameters of perovskite solar cells in all conditions.

|      |         | $V_{oc}$<br>(V) | $J_{sc}$<br>(mA cm <sup>-2</sup> ) | FF<br>(%)  | PCE<br>(%) |
|------|---------|-----------------|------------------------------------|------------|------------|
| 2:3  | average | 1.11±0.02       | 16.87±1.77                         | 45.36±5.1  | 8.46±0.87  |
|      | max     | 1.14            | 17.55                              | 51.95      | 10.36      |
| 2:9  | average | 1.09±0.01       | 21.84±0.97                         | 54.06±2.41 | 12.81±0.55 |
|      | max     | 1.08            | 23.42                              | 55.12      | 14.00      |
| 2:59 | average | 1.06±0.02       | 24.51±0.57                         | 67.50±2.00 | 17.46±0.73 |
|      | max     | 1.07            | 25.04                              | 71.98      | 19.33      |
